# Supplementary material for: The impact of steam on the electronic structure of the selective propane oxidation catalyst MoVTeNb oxide (orthorhombic M1 phase)
Source: Royal Society of Chemistry journal article supplement (doi:10.1039/c5cp00289c), 2015-01-01
Supplement: c5cp00289c1.pdf [file c5cp00289c1.pdf]

## SUPPORTING INFORMATION:

# The Impact of Steam on the Electronic Structure of the Selective Propane Oxidation Catalyst MoVTeNb Oxide (Orthorhombic M1 Phase)

Christian Heine,<sup>†</sup> Michael Hävecker,<sup>†,‡</sup> Annette Trunschke,<sup>†</sup> Robert Schlögl,<sup>†</sup> and  
Maik Eichelbaum<sup>\*,†,¶</sup>

*Department of Inorganic Chemistry, Fritz-Haber-Institut der Max-Planck-Gesellschaft,  
Faradayweg 4-6, 14195 Berlin, Germany, Solar Energy Research, Helmholtz-Zentrum Berlin /  
BESSY II, Albert-Einstein-Straße 15, 12489 Berlin, Germany, and BasCat, UniCat BASF  
JointLab, TU Berlin, Marchstraße 6, 10587 Berlin, Germany*

E-mail: me@fhi-berlin.mpg.de

Phone: +49 (0)30 84134566. Fax: +49 (0)30 84134405

---

\*To whom correspondence should be addressed

<sup>†</sup>Fritz-Haber-Institut

<sup>‡</sup>Helmholtz-Zentrum Berlin

<sup>¶</sup>BasCat, UniCat BASF JointLab

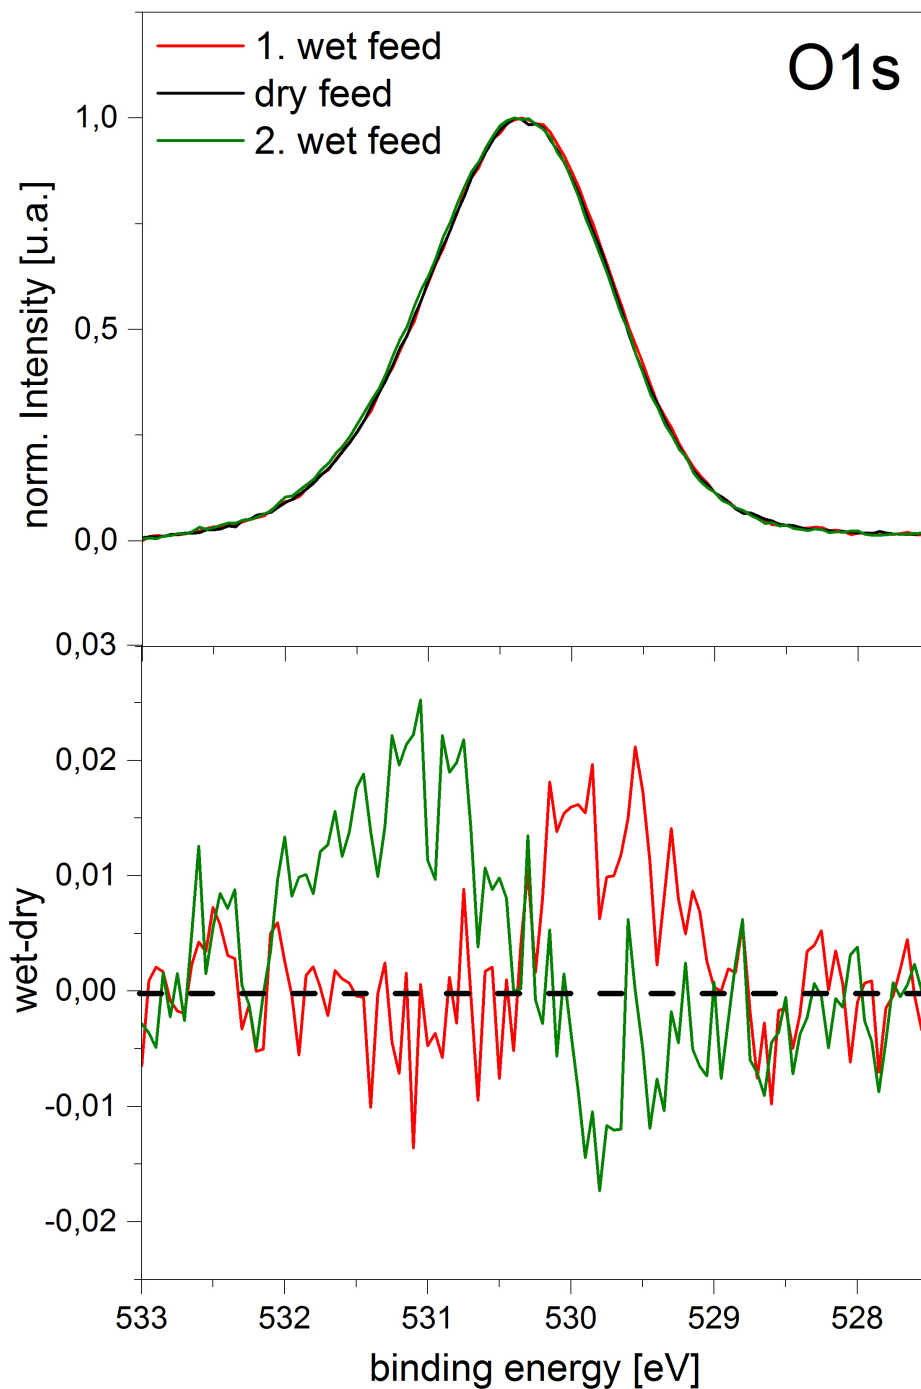

Figure S 1: O1s spectra of the MoVTaNbO<sub>x</sub> M1 phase at 400°C, 25 Pa in dry (1 Nml/min propane, 2 Nml/min oxygen and 3 Nml/min helium) and wet feed (1 Nml/min propane, 2 Nml/min oxygen and 3 Nml/min steam) and difference between the spectra measured in the two feeds.

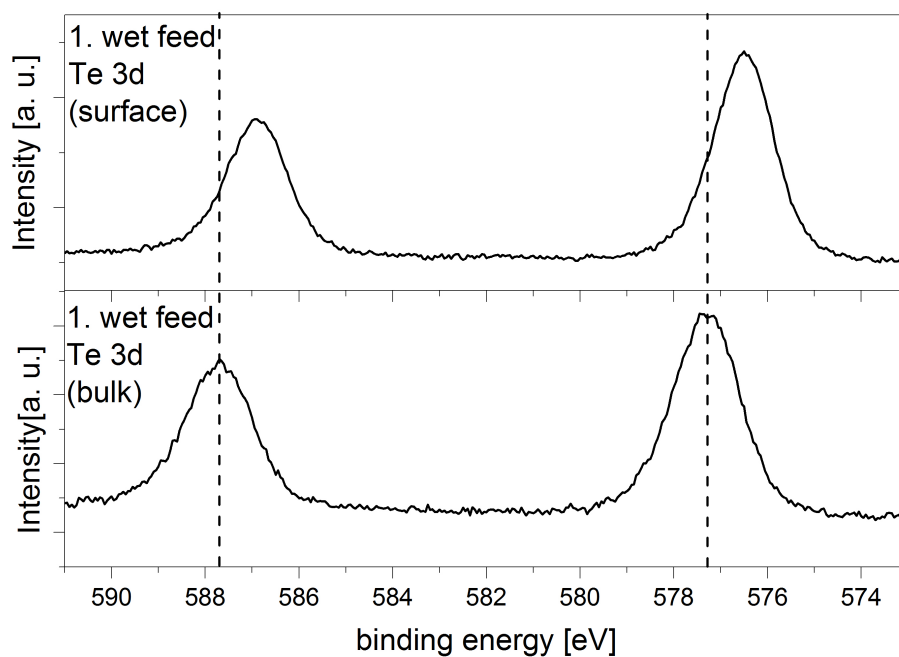

Figure S 2: Surface (kinetic energy: 150 eV) and bulk sensitively (kinetic energy: 650 eV) measured Te3d core level spectra of the MoVTeNbO<sub>x</sub> M1 phase at 400°C, 25 Pa in wet feed.
